# Supplementary material
Source: PubMed Central journal article supplement (PMC5721246)
Supplement: CEI-191-96-s001.pdf [file CEI-191-96-s001.pdf]

**Supplemental Table 1.** Antibodies, reagents and PCR primers used in this study

| Antibodies                                 | Clone      | Manufacture                            |
|--------------------------------------------|------------|----------------------------------------|
| mouse anti-LL-37                           | D-5        | Santa Cruz Biotechnology, Dallas, TX   |
| rabbit anti-NF $\kappa$ Bp65               | polyclonal |                                        |
| mouse anti-phosphorylated-c-Jun            | KM-1       |                                        |
| rabbit anti- $\alpha$ -smooth muscle actin | 1A-4       | Abcam, Cambridge, UK                   |
| rabbit anti-phosphorylated p44/42MAPK      | 197G2      | Cell Signaling Technology, Beverly, MA |
| rabbit anti-total p44/42MAPK               | 137F5      |                                        |
| rabbit anti-phosphorylated p38MAPK         | 12F8       |                                        |
| rabbit anti-total p38MAPK                  | polyclonal |                                        |
| rabbit anti-phosphorylated SAPK/JNK        | polyclonal |                                        |
| rabbit anti-total SAPK/JNK                 | polyclonal |                                        |
| mouse anti-Lamin A/C                       | 4C11       |                                        |
| rabbit anti-GAPDH                          | 14C10      | R&D systems, Minneapolis, MN           |
| HRP-labeled anti-rabbit IgG                | polyclonal |                                        |
| HRP-labeled anti-mouse IgG                 | polyclonal | Vector Labs, Burlingame, CA            |
| Dylight488-labeled anti-mouse IgG          | polyclonal |                                        |
| Dylight549-labeled anti-rabbit IgG         | polyclonal |                                        |

| Reagents                              | Manufacture                          |
|---------------------------------------|--------------------------------------|
| recombinant human LL-37               | R&D systems, Minneapolis, MN         |
| Polyinosinic-polycytidylic acid       | InvivoGen, San Diego, CA             |
| Lipopolysaccharide                    |                                      |
| Flagellin                             |                                      |
| CpG                                   |                                      |
| NF- $\kappa$ Bp65 siRNA               | Santa Cruz Biotechnology, Dallas, TX |
| c-Jun siRNA                           |                                      |
| TRIF siRNA                            |                                      |
| TRAF3 siRNA                           |                                      |
| TRAF6 siRNA                           |                                      |
| TAK1 siRNA                            |                                      |
| control siRNA                         | Merck, Darmstadt, Germany            |
| PD098059 (p42/44MAPK inhibitor)       |                                      |
| U0216 (p42/44MAPK inhibitor)          |                                      |
| SB203580 (p38MAPK inhibitor)          | Calbiochem, San Diego, CA            |
| JNK inhibitor I                       |                                      |
| N-formyl-methionyl-leucylphenylalanin | Shiga, St. Louis, MO                 |

HRP, horseradish peroxidase.

| Gene           | Accession Number |                     | Primers                                                         |
|----------------|------------------|---------------------|-----------------------------------------------------------------|
| LL-37          | NM_004345.4      | sense<br>anti-sense | 5'-TAGATGGCATCAACCAGCGG-3'<br>5'-CCAGGAGGCGGTATAGGTTA-3'        |
| IL-6           | NM_000600.4      | sense<br>anti-sense | 5'-GGTACATCCTCGACGGCATCT-3'<br>5'-GTGCCTCTTTGCTGCTTTCAC-3'      |
| IL-8           | NM_000584.3      | sense<br>anti-sense | 5'-AGGGTTGCCAGATGCAATAC-3'<br>5'-GCAAACCCATTCAATTCCTG-3'        |
| $\beta$ -actin | NM_001101.3      | sense<br>anti-sense | 5'-TGACCCAGATCATGTTTGAGACCT-3'<br>5'-CCACGTCACACTTCATGATGGAG-3' |
